# Supplementary material for: Suppression of Nonlinear Optical Effects in DWDM-PON by Frequency Modulation Non-Coherent Detection
Source: MDPI journal article supplement (doi:10.3390/photonics10030323), 2023-03-17
Supplement: s1 [file s1]

# Supplementary Material: Suppression of Nonlinear Optical Effects in DWDM-PON by Frequency Modulation Non-Coherent Detection

Lei Xin, Xiao Xu \*, Liuge Du, Chonglei Sun, Feng Gao and Jia Zhao \*

School of Information Science and Engineering, Shandong University, Qingdao 266237, China

\* Correspondence: xuxiao@sdu.edu.cn (X.X.); zhaojia@sdu.edu.cn (J.Z.)

## S1. Theoretical Model for the DFB laser

The DFB laser is simulated by a traveling wave model (TWM) [16]:

$$\frac{dN(z,t)}{dt} = I(t)/(eV) - N(z,t)/\tau_c - v_g P_s(z,t)g(z,t)/[1 + \varepsilon P_s(z,t)], \quad (S1a)$$

$$\left(\frac{1}{v_g} \frac{\partial}{\partial t} + \frac{\partial}{\partial z}\right) F(z,t) \quad (S1b)$$

$$= \left\{ -j\delta + \frac{1}{2} \left[ \frac{\Gamma g(z,t)}{1 + \varepsilon P_s(z,t)} - \alpha \right] \right\} F(z,t) + j\kappa R(z,t) + \tilde{s}^f(z,t),$$

$$\left(\frac{1}{v_g} \frac{\partial}{\partial t} - \frac{\partial}{\partial z}\right) R(z,t) \quad (S1c)$$

$$= \left\{ -j\delta + \frac{1}{2} \left[ \frac{\Gamma g(z,t)}{1 + \varepsilon P_s(z,t)} - \alpha \right] \right\} R(z,t) + j\kappa F(z,t) + \tilde{s}^r(z,t),$$

where  $N(z,t)$  is the carrier density,  $I(t)$  the injected current,  $e$  the electron charge,  $V$  the active region volume,  $\tau_c$  the carrier lifetime,  $v_g = c/n_g$  the group velocity,  $c$  the speed of light,  $n_g$  the group index,  $P_s(z,t) = n_{eff}/(2hv_0) \sqrt{\varepsilon_0/\mu_0} \Gamma/(dwv_g) \cdot [|F(z,t)|^2 + |R(z,t)|^2]$  the photon density distribution,  $n_{eff} = n_{eff}^0 - \lambda_0/(4\pi) \alpha_{LEF} \cdot \Gamma g(z,t)$  effective index,  $n_{eff}^0$  effective index without injection,  $\lambda_0$  the peak gain wavelength,  $\alpha_{LEF}$  linewidth enhancement factor,  $\Gamma$  the optical confinement factor,  $g(z,t) = a \ln[N(z,t)/N_0]$  the material optical gain,  $a$  the material gain coefficient,  $N_0$  the transparent carrier density,  $h$  Planck's constant,  $v_0$  the optical frequency corresponding to  $\lambda_0$ ,  $\varepsilon_0$  the permittivity of a vacuum,  $\mu_0$  the permeability of a vacuum,  $d$  thickness of active region,  $w$  width of active region,  $F(z,t)$  the slowly varying envelopes of the forward propagating fields,  $R(z,t)$  the slowly varying envelopes of the backward propagating fields,  $\varepsilon$  nonlinear gain suppression coefficient,  $j$  the imaginary unit,  $\delta = [2\pi n_{eff}^0/\lambda_0 - 1/2 \alpha_{LEF} \Gamma g(z,t) - \pi/\Lambda]$  the phase detuning factor from the Bragg wavelength,  $\Lambda$  Bragg grating period,  $\alpha$  the optical modal loss, and  $\kappa$  grating coupling coefficient.

The magnitude of the spontaneous emission noise fields  $\tilde{s}^f(z,t,\lambda_i)$  and  $\tilde{s}^r(z,t,\lambda_i)$  are approximated as Gaussian random processes with a zero mean and satisfy following autocorrelation function [1]:

$$\langle |\tilde{s}^{f,r}(z,t)| |\tilde{s}^{f,r}(z',t')| \rangle = 2 \sqrt{\frac{\mu_0 \Gamma g_{sp} h v_0}{\varepsilon_0 n_{eff}}} \delta(z - z') \delta(t - t'), \quad (S2)$$

where  $\gamma$  indicates the spontaneous coupling factor,  $g_{sp}$  the spontaneous emission gain, and  $\delta(\cdot)$  Dirac's delta function. Again, the phase of the spontaneous emission noise fields is assumed to be uniformly distributed between  $0-2\pi$ .

The finite bandwidth of the gain profile is modeled by an infinite impulse response (IIR) filter approach [32,33]:

$$|H(\omega)|^2 = \{(1 - \eta)^2 / [1 + \eta^2 - 2\eta \cos(\omega \Delta t)]\}, \quad (S3)$$

where  $\eta$  indicates the filter coefficient that controls the filter bandwidth and  $\Delta t$  the time marching step in simulation.

## S2. Theoretical Model for the SOA

The numerical model that we have adopted to describe the SOA is given as [34–36]:

$$\frac{dN(z, t)}{dt} = \frac{I(t)}{eV} - \frac{N(z, t)}{\tau_c} - v_g \sum_{i=-M}^M P_s(z, t, \lambda_i) g(z, t, \lambda_i) / [1 + \varepsilon P_{tot}(z, t)], \quad (S4a)$$

$$\left( \frac{1}{v_g} \frac{\partial}{\partial t} + \frac{\partial}{\partial z} \right) F(z, t, \lambda_i) \quad (S4b)$$

$$= \left\{ j \left[ \frac{1}{2} \alpha_{LEF} \Gamma g(z, t, \lambda_i) \right] + \frac{1}{2} \left[ \frac{\Gamma g(z, t, \lambda_i)}{1 + \varepsilon P_{tot}(z, t)} - \alpha \right] \right\} F(z, t, \lambda_i) + \tilde{s}^f(z, t, \lambda_i),$$

$$\left( \frac{1}{v_g} \frac{\partial}{\partial t} - \frac{\partial}{\partial z} \right) R(z, t, \lambda_i) \quad (S4c)$$

$$= \left\{ j \left[ \frac{1}{2} \alpha_{LEF} \Gamma g(z, t, \lambda_i) \right] + \frac{1}{2} \left[ \frac{\Gamma g(z, t, \lambda_i)}{1 + \varepsilon P_{tot}(z, t)} - \alpha \right] \right\} R(z, t, \lambda_i) + \tilde{s}^r(z, t, \lambda_i),$$

where  $N(z, t)$  is the carrier density,  $I(t)$  the injected current,  $e$  the electron charge,  $V$  the active region volume,  $\tau_c$  the carrier lifetime,  $v_g = c/n_g$  the group velocity,  $c$  the speed of light,  $n_g$  the group index,  $P_s(z, t, \lambda_i) = n_{eff} / (2h\nu_i) \sqrt{\varepsilon_0 / \mu_0} \Gamma / (dwv_g) \cdot [|F(z, t, \lambda_i)|^2 + |R(z, t, \lambda_i)|^2]$  the photon density distribution of the  $i^{th}$  wavelength channel,  $\lambda_i$  is the wavelength of the  $i^{th}$  ( $i = 0, \mp 1, \mp 2, \dots, \mp M$ ) channel in the sliced spectrum,  $n_{eff} = n_{eff}^0 - \lambda_0 / (4\pi) \alpha_{LEF} \Gamma g(z, t, \lambda_i)$  effective index,  $n_{eff}^0$  effective index without injection,  $\lambda_0$  the peak gain wavelength,  $\alpha_{LEF}$  linewidth enhancement factor,  $\Gamma$  the optical confinement factor,  $g(z, t, \lambda_i) = a \ln[N(z, t) / N_0] [1 - 0.5(\lambda_i - \lambda_0 / \Delta\lambda_g)^2]$  the material optical gain,  $a$  the material gain coefficient,  $N_0$  the transparent carrier density,  $\Delta\lambda_g$  the gain profile width,  $h$  Planck's constant,  $\nu_i$  the optical frequency corresponding to  $\lambda_i$ ,  $\varepsilon_0$  the permittivity of a vacuum,  $\mu_0$  the permeability of a vacuum,  $d$  thickness of active region,  $w$  width of active region,  $F(z, t, \lambda_i)$  the slowly varying envelopes of the forward propagating fields,  $R(z, t, \lambda_i)$  the slowly varying envelopes of the backward propagating fields,  $\varepsilon$  nonlinear gain suppression coefficient,  $P_{tot}(z, t) = \sum_{i=-M}^M P_s(z, t, \lambda_i)$  the total photon density distribution in all wavelength channel,  $j$  the imaginary unit, and  $\alpha$  the optical modal loss.

The magnitude of the spontaneous emission noise fields  $\tilde{s}^f(z, t)$  and  $\tilde{s}^r(z, t)$  are treated in a similar way as equation (S2) in section 1:

$$\langle |\tilde{s}^{f,r}(z, t)| |\tilde{s}^{f,r}(z', t')| \rangle = 2 \sqrt{\frac{\mu_0 \Gamma \gamma g_{sp} h \nu_0}{\varepsilon_0 n_{eff}}} \delta(z - z') \delta(t - t'), \quad (S5)$$

where  $\gamma$  the spontaneous coupling factor,  $R_{sp}(z, t, \lambda_i)$  the spontaneous emission rate,  $d_z$  the length of a subsection introduced by the spatial discretization of the active region along the wave propagation direction, and  $\delta(\cdot)$  Dirac's delta function. The phase of the spontaneous emission noise fields is assumed to be uniformly distributed between  $0-2\pi$ .
