# Supplementary material for: Suppression of Nonlinear Optical Effects in DWDM-PON by Frequency Modulation Non-Coherent Detection
Source: MDPI journal article supplement (doi:10.3390/photonics10030323), 2023-03-17
Supplement: s1 [file s1]

Archive with 1 entries (1 files):
- photonics-2255601-supplementary.pdf
